# Supplementary material for: Genome wide DNA methylation profiling identifies specific epigenetic features in high-risk cutaneous squamous cell carcinoma
Source: PubMed Central journal article supplement (PMC6924689; doi:10.1371/journal.pone.0223341), 2019-12-20

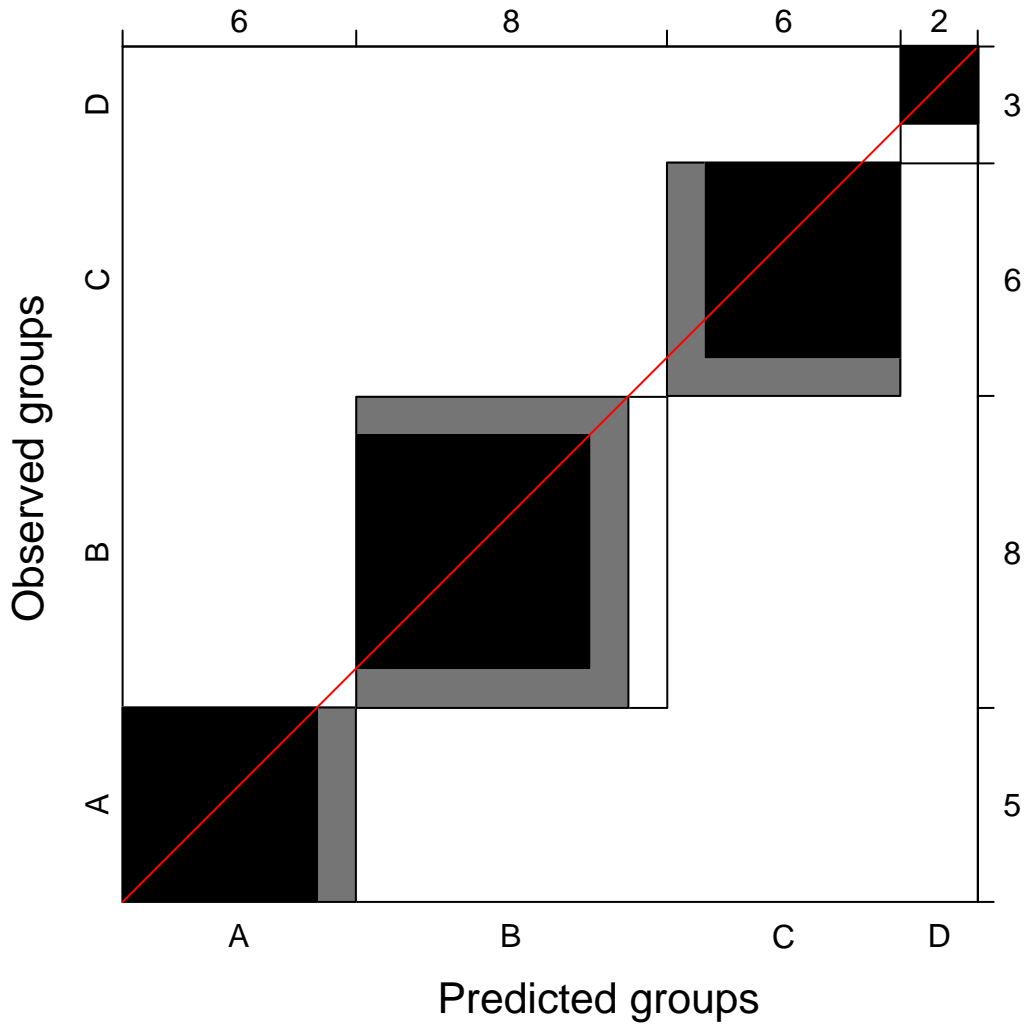

Supplement: pone.0223341.s001.pdf [file pone.0223341.s001.pdf]
